# Supplementary material for: Impact of Radical Hysterectomy Versus Simple Hysterectomy on Survival of Patients with Stage 2 Endometrial Cancer: A Meta-analysis
Source: Springer Nature journal article supplement (doi:10.1245/s10434-019-07472-y), 2019-05-30
Supplement: MOESM1 [file 16761152]

**Supplementary Methods**

**Search strategy**

Relevant studies were identified through systematic searches of the following databases to July 2018: PUBMED, MEDLINE, EMBASE, Cochrane Library, and Web of Science. The following terms were used: ‘endometrial neoplasm’ or ’endometrial cancer’ or ‘endometrial carcinoma’ and ‘radical’ or ‘simple’ or ‘total’ or ‘extrafascial’ or ‘hysterectomy’. Two investigators independently screened the search results for titles and abstracts. Reference lists of the relevant articles were also manually searched to find other potentially eligible papers. Unpublished studies were identified by searching ClinicalTrials.gov, Cochrane Central Register of Controlled Trials (CENTRAL), Gynecological Cancer Group Specialized Register, and World Health Organization trials page.

**Selection Criteria**

All observational and experimental studies, that compared survival between RH and SH groups in FIGO stage II EC patients who underwent surgical treatment, and had sufficient data to obtain hazard ratio (HR) with 95% confidence interval (CI) for at least one of the quantitative survival outcomes including overall survival (OS) and progression-free survival (PFS), were included. We did not distinguish between mRH and RH (Piver–Rutledge class II and III).5 FIGO 2009 and FIGO 1988 were both allowed for staging. We considered Kaplan–Meier curves or Cox proportional hazards regression models to calculate HR for survival comparison between the two surgery groups. In case of two or more studies possibly including overlapping patients, we selected the one with higher quality or more detailed publication. Review articles, case reports, letters to the editor without original data, and animal experimental studies were excluded. Any discrepancies between the two reviewers were addressed by reevaluating the original article.

**Data Extraction**

Two investigators independently extracted data from the included studies using a standardized form. Discrepancies between the reviewers were resolved through discussion. The following information was extracted from each eligible study: (1) publication details (the first author’s name, year of publication, and country); (2) study design (study type, data source, research period, sample size, and follow-up months); (3) population characteristics (age, disease staging, histology, tumor grade, lymph-vascular invasion, deep myometrial invasion, adjuvant radiotherapy (ART) and chemotherapy); (4) quantitative outcomes (HR with 95% CI for overall survival (OS) and progression-free survival (PFS) in stage Ⅱ EC patients). HRs were used directly if reported in the original study by the author. When not provided, they were estimated from the data extracted from published Kaplan–Meier curves.6

**Quality Assessment**

The quality of included studies was assessed independently by two reviewers according to the Newcastle-Ottawa Quality Assessment Scale (NOS) for cohort studies.7 Nine scores were allocated for three factors: selection of patients (four scores), comparability of study groups (two scores), and assessment of outcome (three scores). Any discrepancy was resolved by the adjusting senior author. We defined retrospective studies achieving eight or more stars as of high quality, studies achieving six or seven stars as of medium quality, and studies scored less than six stars as of low quality.

**Statistical Analysis**

All statistical analyses were carried out by Stata V.12.0 (Stata Corp, College Station, Texas, USA), considering significant the two-sided *P* value less than 0.05. Pooled measure was calculated with the statistic HR (with 95% CI) as a long-term outcome for survival analysis.8 An HR<1 revealed a survival benefit favoring the RH group. Statistical heterogeneity was assessed using the *I2* statistic and Q statistic.9 A random-effect model was applied when significant heterogeneity existed (*I2* value >50%);9 otherwise, a fixed-effect model was used. Subgroup analysis was carried out to evaluate the impact of FIGO stage updating in 2009 on the results. Sensitivity analysis was conducted by excluding the key studies. Publication bias was assessed by inspection of funnel plots, Egger test and Begg test.
