# Supplementary material for: Impact of Radical Hysterectomy Versus Simple Hysterectomy on Survival of Patients with Stage 2 Endometrial Cancer: A Meta-analysis
Source: Springer Nature journal article supplement (doi:10.1245/s10434-019-07472-y), 2019-05-30
Supplement: MOESM4 [file 16761152]

**Supplementary Table S2. List of 32 excluded studies after full texts screened**

| NO. | Author,Year | Title | Reason for ineligible |
| --- | --- | --- | --- |
| 1 | Loeffler J.S., 1988 | Whole Abdominal Irradiation for Tumors of the Uterine Corpus | No stage II patients |
| 2 | Feng W, 2013 | Stages I to II WHO 2003YDefined Low-Grade Endometrial Stromal Sarcoma: How Much Primary Therapy Is Needed and How Little Is Enough? | No survival data for stage II patients |
| 3 | Miyamoto M, 2016 | Is Modified Radical Hysterectomy Needed for Patients with Clinical Stage I/II Endometrial Cancers? A Historical Control Study | No survival data for stage II patients |
| 4 | Signorelli M., 2009 | Modified Radical Hysterectomy Versus Extrafascial Hysterectomy in the Treatment of Stage I Endometrial Cancer:  Results From the ILIADE Randomized Study | No survival data for stage II patients |
| 5 | Andersen E.S., 1990 | Stage II Endometrial Carcinoma: Prognostic Factors and the Results of Treatment | No comparison between surgery groups |
| 6 | Bezerra A.L., 2014 | Surgical treatment of clinically early-stage endometrial carcinoma without systematic lymphadenectomy | No comparison between surgery groups |
| 7 | Eltabbakh G.H.,1999 | Survival of Women with Surgical Stage II Endometrial Cancer | No comparison between surgery groups |
| 8 | Lanciano R.M., 1990 | Influence of grade, histologic subtype, and timing of radiotherapy on outcome among patients with stage II carcinoma of the endometrium | No comparison between surgery groups |
| 9 | Lester-Coll NH, 2017 | Adjuvant Therapy Use and Survival in Stage II Endometrial Cancer | No comparison between surgery groups |
| 10 | Rubin S.C., 1992 | Management of Endometrial Adenocarcinoma with Cervical Involvement | No comparison between surgery groups |
| 11 | Boothby R.A., 1989 | Treatment of Stage II Endometrial Carcinoma | No SH group |
| 12 | Yin H.M., 2016 | Comparative analyses of postoperative complications and prognosis of different surgical procedures in stage II endometrial carcinoma treatment | No SH group |
| 13 | Damiani G.R., 2015 | Robotic approach using simple and radical hysterectomy for endometrial cancer with long-term follow-up evaluation | No survival data |
| 14 | Lee T.S., 2010 | Necessity of Radical Hysterectomy for Endometrial Cancer Patients with Cervical Invasion | No survival data |
| 15 | Nahhas W.A., 1980 | Stage II Endometrial Carcinoma | No survival data |
| 16 | Nishida T, 1989 | Therapeutic and staging operations for endometrial carcinomas | No survival data |
| 17 | Terai Y, 2014 | Total laparoscopic modiﬁed radical hysterectomy with lymphadenectomy for endometrial cancer compared with laparotomy | No survival data |
| 18 | Zablow A, 1994 | Stage II adenocarcinoma of the endometrium treated by two standard regimens of combined preoperative irradiation and surgery | No survival data |
| 19 | Ureyen I, 2014 | Analysis of Patients with 1988 FIGO Stage-II Endometrial Cancer | No survival data |
| 20 | Boente M.P., 1995 | Recurrence Patterns and Complications in Endometrial  Adenocarcinoma with Cervical Involvement | HR value not available |
| 21 | Elshaikh M.A., 2015 | Recurrence patterns and survival endpoints in women with stage II uterine endometrioid carcinoma: A multi-institution study | HR value not available |
| 22 | Mariani A, 2001 | Role of Wide/Radical Hysterectomy and Pelvic Lymph Node Dissection in Endometrial Cancer with Cervical Involvement | HR value not available |
| 23 | van Lankveld M.A., 2006 | Compliance to surgical and radiation treatment guidelines in relation to patient outcome in early stage endometrial cancer | HR value not available |
| 24 | Feltmate C.M., 1999 | Predictors of Recurrence in Surgical Stage II Endometrial Adenocarcinoma | HR value unavailable |
| 25 | Ozgul N, 2018 | Oncological Outcomes of Stage II Endometrial Cancer : A Retrospective Analysis of 250 Cases | HR value not available |
| 26 | Tebes S.J., 2005 | Radical Hysterectomy Versus Extrafascial Hysterectomy in the Management of Stage II Endometrial Carcinoma | HR value unavailable |
| 27 | Wojcieszynski AP, 2018 | The role of radiation therapy in the treatment of Stage II endometrial cancer: A large database study | Overlapping data from NCDB database |
| 28 | Wright J.D., 2009 | Optimizing the management of stage II endometrial cancer: the role of radical hysterectomy and radiation | Overlapping data from SEER database |
| 29 | DiSaia P.J., 2010 | Predicting Parametrial Involvement in Endometrial Cancer: Is This the End for Radical Hysterectomies in Stage II Endometrial Cancers? | Review article |
| 30 | Look K, 2002 | Stage I-II endometrial adenocarcinoma evolution of therapeutic paradigms: the role of surgery and adjuvant radiation | Review article |
| 31 | Santos L.D., 2010 | Outcomes and patterns of recurrence of 1988 FIGO stage IIB  endometrioid endometrial carcinoma | Conference abstract |
| 32 | Parija J, 2011 | Observations in early stage endometrial cancers | Conference abstract |
